# Supplementary material for: Dynamics of TCR repertoire and T cell function in COVID-19 convalescent individuals
Source: PubMed Central journal article supplement (PMC8476510; doi:10.1038/s41421-021-00321-x), 2021-09-28
Supplement: 41421_2021_321_MOESM1_ESM.pdf [file 41421_2021_321_MOESM1_ESM.pdf]

## Supplemental information

### Supplementary Fig. S1 Clonal diversity of samples

The clone diversity was displayed via the TCR diversity, percentage of each sample's clone diversity = (TCR classification count / total cell number) \* 100%. Doughnuts **(a)** and column **(b)** showed the T-cell expanded clone and clonal diversity percentage of the representative sample from each group. The colored wedge represents the percentage of not expanded (white/grey), clonal expanded 2 to 4 times (orange), 5 to 9 times (blue), 10 to 49 times (green), 50 to 99 (purple), or more than 100 times (red) in total TCRs in the pool. DC, Discharged group; EFU, Early Follow-up group; LFU, Late Follow-up group; HD, Healthy Donor group.

### Supplementary Fig. S2 V-J gene pairing

Alpha chains V-J pairing of TCRs from representative samples of the HD group (HD#3) **(a)**, the Discharged group (Discharged#2) **(b)** and the Follow-up group (Follow-up#3) **(c)**. Beta chains V-J pairing of TCRs from representative samples of the HD group (HD#3) **(upper panel)**, the Discharged group (Discharged#2) **(middle panel)** and the Follow-up group (Follow-up#3) **(down panel)**.

### Supplementary Fig. S3 Batch effect correction of scRNA-seq data

The merged scRNA-seq data of samples without batch effect **(a)** and with batch effect via “FindIntergrationAnchors” and “IntegrateData” functions of Seurat package (V3.6.0) **(b)** (n = 6 in Discharged and HD groups, n = 7 in Follow-up group). DC, Discharged group; FU, Follow-up group; HD, Healthy Donor group.

**Supplementary Fig. S4 *CD3E*, *CD4* and *CD8A* expression in total TCR paired scRNA-seq data**

The expression of *CD3E*, *CD4* and *CD8A* in total TCR paired scRNA-seq integrated data was displayed by violin plot **(a)** and feature plot **(b)** (n = 6 in Discharged and HD groups, n = 7 in Follow-up group). Teff, effector T; Tex, exhausted T, Tcm, central memory T; Tem, effector memory T; Tm, memory T, Tn, naïve T; Treg, regulatory T.

**Supplementary Fig. S5 Top 20 clones’ projection in total TCR paired scRNA-seq data**

UMAP showing the top 20 clones’ distribution in clusters **(left panel)** and clusters’ distribution **(right panel)**. Teff, effector T; Tex, exhausted T, Tcm, central memory T; Tem, effector memory T; Tm, memory T, Tn, naïve T; Treg, regulatory T.

**Supplementary Fig. S6 Gene expression in each cluster of total TCR paired scRNA-seq data**

Bubble plot showing the expression level of marker genes in the clusters. The clusters were identified with expressed genes: 0:  $CD4^+CCR7^+LEF1^{hi}$  naïve T ( $SELL^+CCR7^+LEF1^{hi}TCF^+$ ); 1:  $CD4^+CCR7^+$  naïve T ( $SELL^+CCR7^+LEF1^+TCF^+$ ); 2:  $CD8A^+GZMH^{hi}$  cytotoxic effector T ( $SELL^-CCR7^-GZMA^+GZMB^{hi}PRF1^{hi}GZMH^{hi}$ ); 3:  $CD8A^+$  exhausted T ( $SELL^-CCR7^-GZMA^+GZMK^+GZMB^-$ ); 4:  $CD8A^+JUN^+LEF1^+$  naïve T ( $SELL^+CCR7^{hi}LEF1^+TCF7^+JUN^+$ ); 5:  $CD8A^+GZMK^+$  effector memory T ( $SELL^-CCR7^-GZMK^+$ ); 6:  $CD8A^+GNLY^{hi}$  cytotoxic effector T ( $SELL^-CCR7^-GZMA^+GZMB^{hi}PRF1^{hi}GZMH^+GNLY^{hi}$ ); 7:  $CD4^+IL7R^{hi}$  effector T ( $SELL^-CCR7^-IL7R^{hi}$ ); 8:  $CD4^+ANXA1^+$  effector T ( $SELL^-CCR7^-JUNB^+EMP3^+ANXA1^+$ ); 9:  $CD4^+$  Treg ( $FOXP3^{hi}IL10RA^{hi}$ ); 10:  $CD8A^+KLRB1^{hi}CXCR4^{hi}$  effector-exhausted intermediated T ( $GZMA^{lo}GZMB^-GZMK^+PRF1^{lo}KLRB1^{hi}CXCR4^{hi}$ ); 11:  $CD4^+CDC25B^{hi}JUNB^+$  memory T ( $SELL^{hi}CCR7^{lo}CDC25B^{hi}JUNB^+$ ); 12:  $CD4^+GZMH^+$  effector ( $SELL^-CCR7^-GZMH^+$ ); 13:  $CD4^+S100A8^{hi}S100A9^{hi}$  Th22 ( $AHR^+S100A8^{hi}S100A9^{hi}$ ); 14:  $CD8A^+LEF1^{lo}$  naïve T ( $SELL^{lo}CCR7^{lo}LEF1^{lo}TCF7^{lo}$ ); 15:  $CD8A^+$  proliferative T subset ( $CSK2^+LIG1^+MKI67^+MCM2^+MCM3^+STMN1^{hi}PDCD1^{lo}TOX^{lo}HAVCR2^{lo}LAG3^{lo}$ ); 16:  $CD8A^+CXCR5^+$  central memory T ( $SELL^{lo}CCR7^{lo}CXCR5^+$ ).

**Supplementary Fig. S7 *CD3E*, *CD4* and *CD8A* expression in the top 20 TCRs paired scRNA-seq data**

The expression of *CD3E*, *CD4* and *CD8A* in the top 20 TCR clonotypes paired scRNA-seq integrated data was displayed by violin plot (a) and feature plot (b) (n = 6 in Discharged and HD groups, n = 7 in Follow-up group). Teff, effector T; Tex, exhausted T; Tcm, central memory T; Tem, effector memory T; Tm, memory T; Tn, naïve T; Treg, regulatory T.

**Supplementary Fig. S8 Samples distribution in the top 20 TCRs paired scRNA-seq data**

(a) UMAP showing the samples' distribution in clusters. (b) Bar plot showing the compositions of each cluster in three groups. Teff, effector T; Tex, exhausted T; Tcm, central memory T; Tem, effector memory T; Tm, memory T; Tn, naïve T; Treg, regulatory T; DC, Discharged group; FU, Follow-up group; HD, Healthy Donor group.

**Supplementary Fig. S9 Gene expression in each cluster of the top 20 TCRs paired scRNA-seq data**

Bubble plot showing the expression level of marker genes in the clusters. The clusters were annotated with the expressed genes: 0: *CD8A*<sup>+</sup> cytotoxic effector T (*GZMB*<sup>+</sup>*PRF1*<sup>+</sup>); 1: *CD8A*<sup>+</sup>*GZMB*<sup>lo</sup>*PRF1*<sup>lo</sup> cytotoxic effector T (*SELL*<sup>-</sup>*CCR7*<sup>-</sup>*GZMB*<sup>lo</sup>*PRF1*<sup>lo</sup>); 2: *CD8A*<sup>+</sup>*GZMB*<sup>hi</sup>*PRF1*<sup>hi</sup> cytotoxic effector T (*GZMB*<sup>hi</sup>*PRF1*<sup>hi</sup>); 3: *CD8A*<sup>+</sup>*GZMA*<sup>int</sup>*GZMB*<sup>hi</sup>*PRF1*<sup>hi</sup> cytotoxic effector T (*SELL*<sup>-</sup>*CCR7*<sup>-</sup>*GZMA*<sup>int</sup>*GZMB*<sup>hi</sup>*PRF1*<sup>hi</sup>); 4: *CD4*<sup>+</sup>*KLRB1*<sup>+</sup>*GZMH*<sup>+</sup> effector T (*SELL*<sup>-</sup>*CCR7*<sup>-</sup>

*KLRB1<sup>+</sup>GZMH<sup>+</sup>*); 5: *CD8A<sup>+</sup>GZMA<sup>lo</sup>GZMK<sup>lo</sup>* effector T (*SELL<sup>-</sup>CCR7<sup>-</sup>GZMA<sup>lo</sup>GZMK<sup>lo</sup>*);  
 6: *CD8A<sup>+</sup>GZMK<sup>+</sup>* effector memory T (*SELL<sup>lo</sup>CCR7<sup>lo</sup>GZMK<sup>+</sup>*); 7: *CD8A<sup>+</sup>KLRB1<sup>hi</sup>*  
*CXCR4<sup>hi</sup>* terminal differentiation T (*ID2<sup>hi</sup>PRDMI<sup>+</sup>IL7R<sup>hi</sup>KLRB1<sup>hi</sup>CXCR4<sup>hi</sup>*); 8:  
*CD8A<sup>+</sup>CD7<sup>+</sup>GZMA<sup>lo</sup>GZMB<sup>hi</sup>PRF1<sup>hi</sup>* effector-exhaustion intermediate T  
 (*HAVCR2<sup>+</sup>LAG3<sup>lo</sup>CD7<sup>+</sup>GZMA<sup>lo</sup>GZMB<sup>hi</sup>PRF1<sup>hi</sup>*); 9: degranulation T  
 (*JUND<sup>hi</sup>S100A8<sup>hi</sup>S100A9<sup>hi</sup>*); 10: *CD8A<sup>+</sup>CXCR5<sup>+</sup>* central memory T (*SELL<sup>+</sup>CCR7<sup>-</sup>*  
*JUN<sup>+</sup>CXCR5<sup>+</sup>*); 11: *CD8A<sup>+</sup>GZMB<sup>int</sup>PRF1<sup>int</sup>* cytotoxic effector T (*SELL<sup>lo</sup>CCR7<sup>-</sup>*  
*GZMB<sup>int</sup>PRF1<sup>int</sup>*); 12: *CD8A<sup>+</sup>CD160<sup>hi</sup>* effector T (*SELL<sup>-</sup>CCR7<sup>-</sup>CD160<sup>hi</sup>*); 13: *CD8A<sup>+</sup>*  
 high cytotoxic potential effector T (*SELL<sup>-</sup>CCR7<sup>-</sup>PRF1<sup>+</sup>ITGAM<sup>+</sup>*); 14: *CD8A<sup>+</sup>* terminal  
 proliferative T (*CSK2<sup>+</sup>LIG1<sup>+</sup>MKI67<sup>+</sup>MCM2<sup>+</sup>MCM3<sup>+</sup>STMN1<sup>hi</sup>*); 15: *CD4<sup>+</sup>* exhausted  
 T (*SELL<sup>-</sup>CCR7<sup>-</sup>PDCD1<sup>+</sup>TOX<sup>+</sup>PRDMI<sup>+</sup>GZMA<sup>hi</sup>GZMK<sup>hi</sup>*); 16: *CD4<sup>+</sup>IFITM2<sup>hi</sup>* effector  
 T (*SELL<sup>-</sup>CCR7<sup>-</sup>IFITM1<sup>+</sup>IFITM2<sup>hi</sup>*).

**Supplementary Fig. S10 Gene concept network analysis of differentially expressed genes of *CD3E<sup>+</sup>CD8A<sup>+</sup>CD4<sup>-</sup>* clusters in top 20 TCRs paired scRNA-seq data from Discharged group vs. HD group group**

The bubble plot of selected granzyme- and interferon – related genes' expression level in of *CD3E<sup>+</sup>CD8A<sup>+</sup>CD4<sup>-</sup>* clusters in top 20 clonotypes from Discharged group vs. HD group (n = 6 per group).

**Supplementary Fig. S11 Biological process and GSEA analysis for total  $CD3E^+CD8A^+CD4^-$  clusters from Discharged group vs. HD group**

(a) Using GSEA to analyze expressed genes from  $CD3E^+CD8A^+CD4^-$  clusters, 2 gene sets of interferon response up-regulated in Discharged group comparing with HD group (n = 6 per group). NES, normalized ES; FDR, false discovery rate; NOM p, normalized p value. (b) Top 20 BP enrichment analysis of DEGs from  $CD3E^+CD8A^+CD4^-$  clusters, which up-regulated in Discharged group from Discharged vs. HD integrated data (n = 6 per group).

**Supplementary Fig. S12 GSEA analysis for total  $CD3E^+CD8A^+CD4^-$  clusters from Follow-up group vs. HD group**

Using GSEA to analyze expressed genes from  $CD3E^+CD8A^+CD4^-$  clusters, 3 gene sets about metabolism up-regulated in total Follow-up group from total Follow-up vs. HD (n = 6 in HD group, n = 7 in Follow-up group). NES, normalized ES; FDR, false discovery rate; NOM p, normalized p value.

**Supplementary Fig. S13 GSEA analysis for top 20 TCRs  $CD3E^+CD8A^+CD4^-$  clusters from Early Follow-up group vs. HD group**

Top 20 BP enrichment analysis of DEGs from  $CD3E^+CD8A^+CD4^-$  clusters, which up regulated in Early Follow-up group from Early Follow-up vs. HD integrated data (n = 3 in Early Follow-up groups, n = 6 in HD group).

**Supplementary Fig. S14 Transcription factor analysis of  $CD8A^+GZKM^+$  effector memory T cells from Late Follow-up group via IRIS3 from IRIS3 website**

**Supplementary Table S1. Clinical and Pathological Characteristics of the COVID-19 Patients and Healthy Donors**

**Supplementary Table S2. The scRNA-seq / scTCR-seq protocol and data characteristics in the current study via Cell Ranger analysis**

**Supplementary Table S3. The scRNA-seq / scTCR-seq protocol and data characteristics in the current study via Seurat package**

**Supplementary Table S4. Performed scRNA-seq and paired TCR cell count in each group**

**Supplementary Table S5. The unique-clone and multi-clone percentage in each group**



# Supplementary Fig. S1

**a**

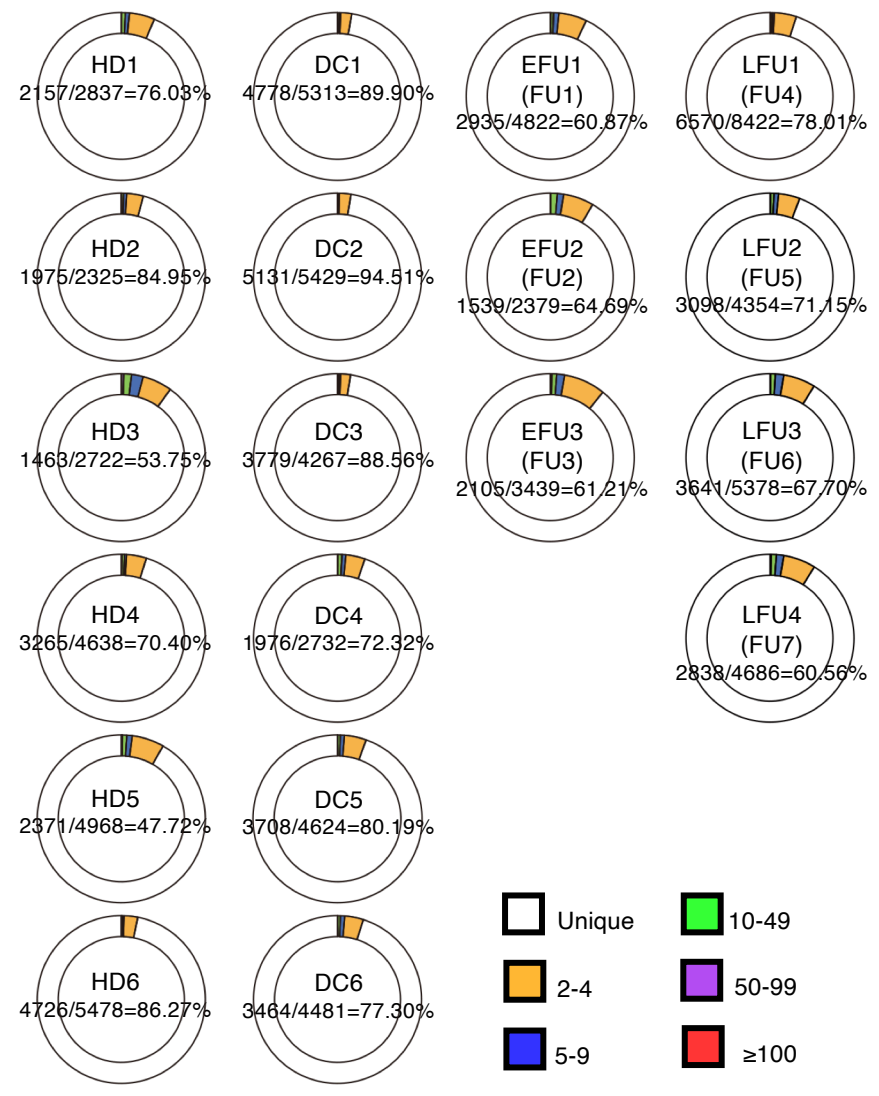

**b**

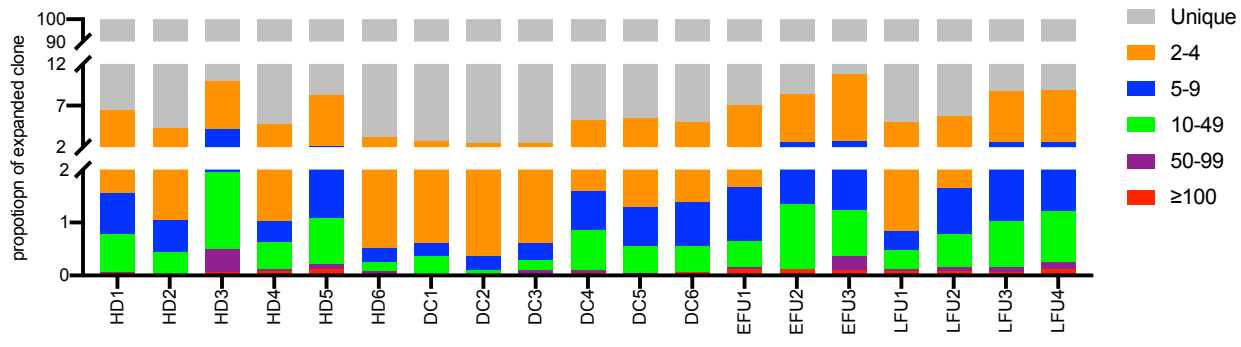

# Supplementary Fig. S2

**a**

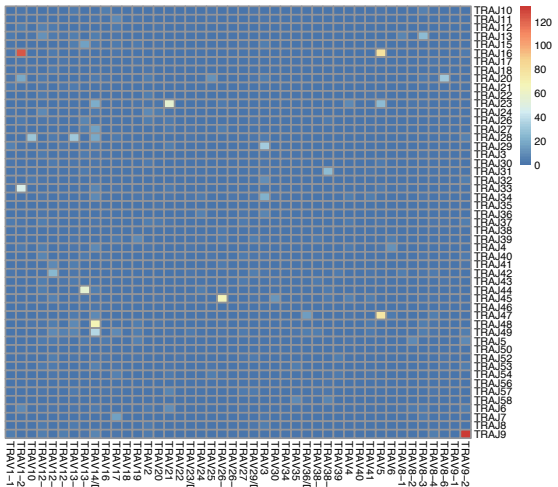

**b**

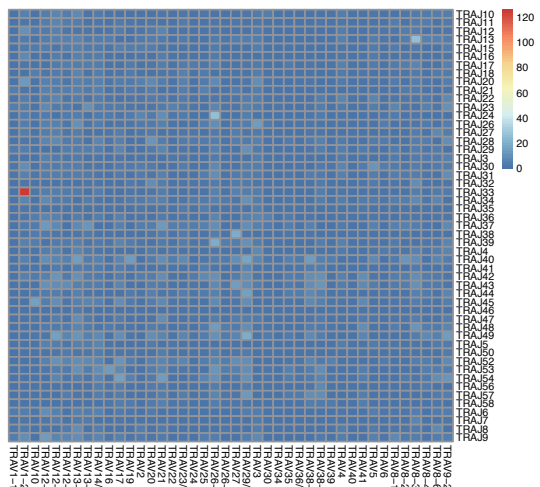

**c**

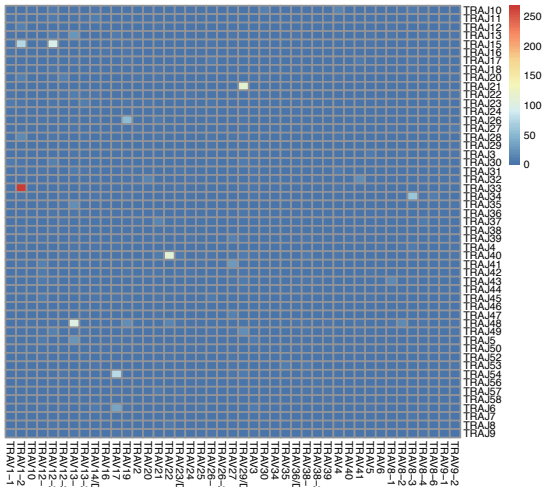

**d**

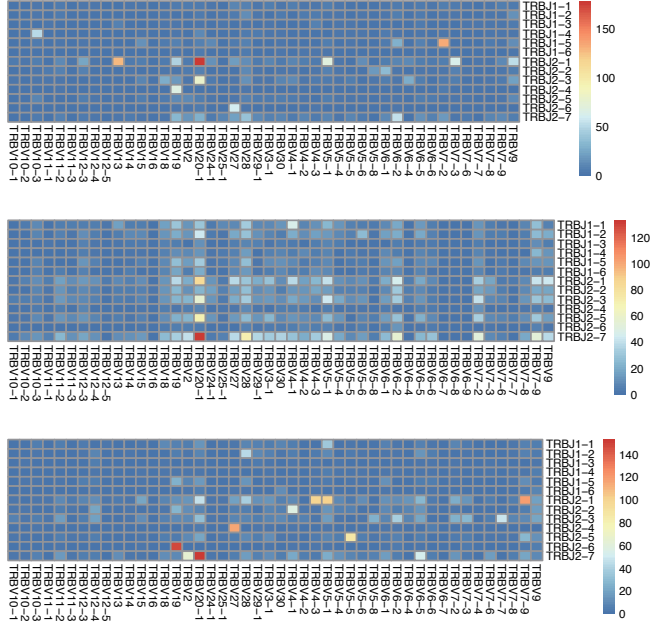

# Supplementary Fig. S3

**a**

Without Batch Effect Correction

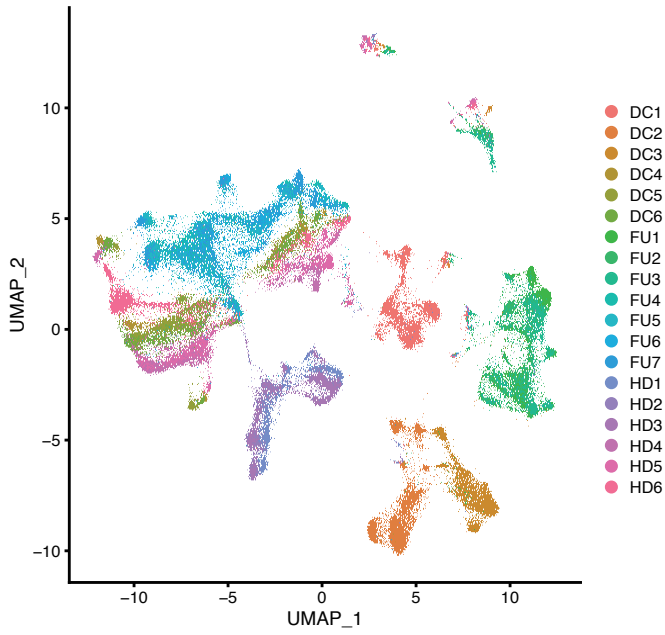

**b**

Batch Effect Correction by Seurat Package

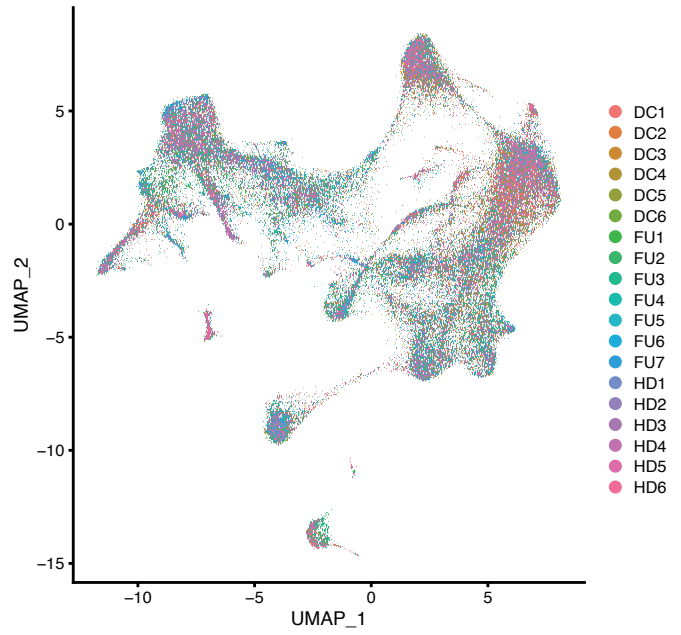

# Supplementary Fig. S4

**a**

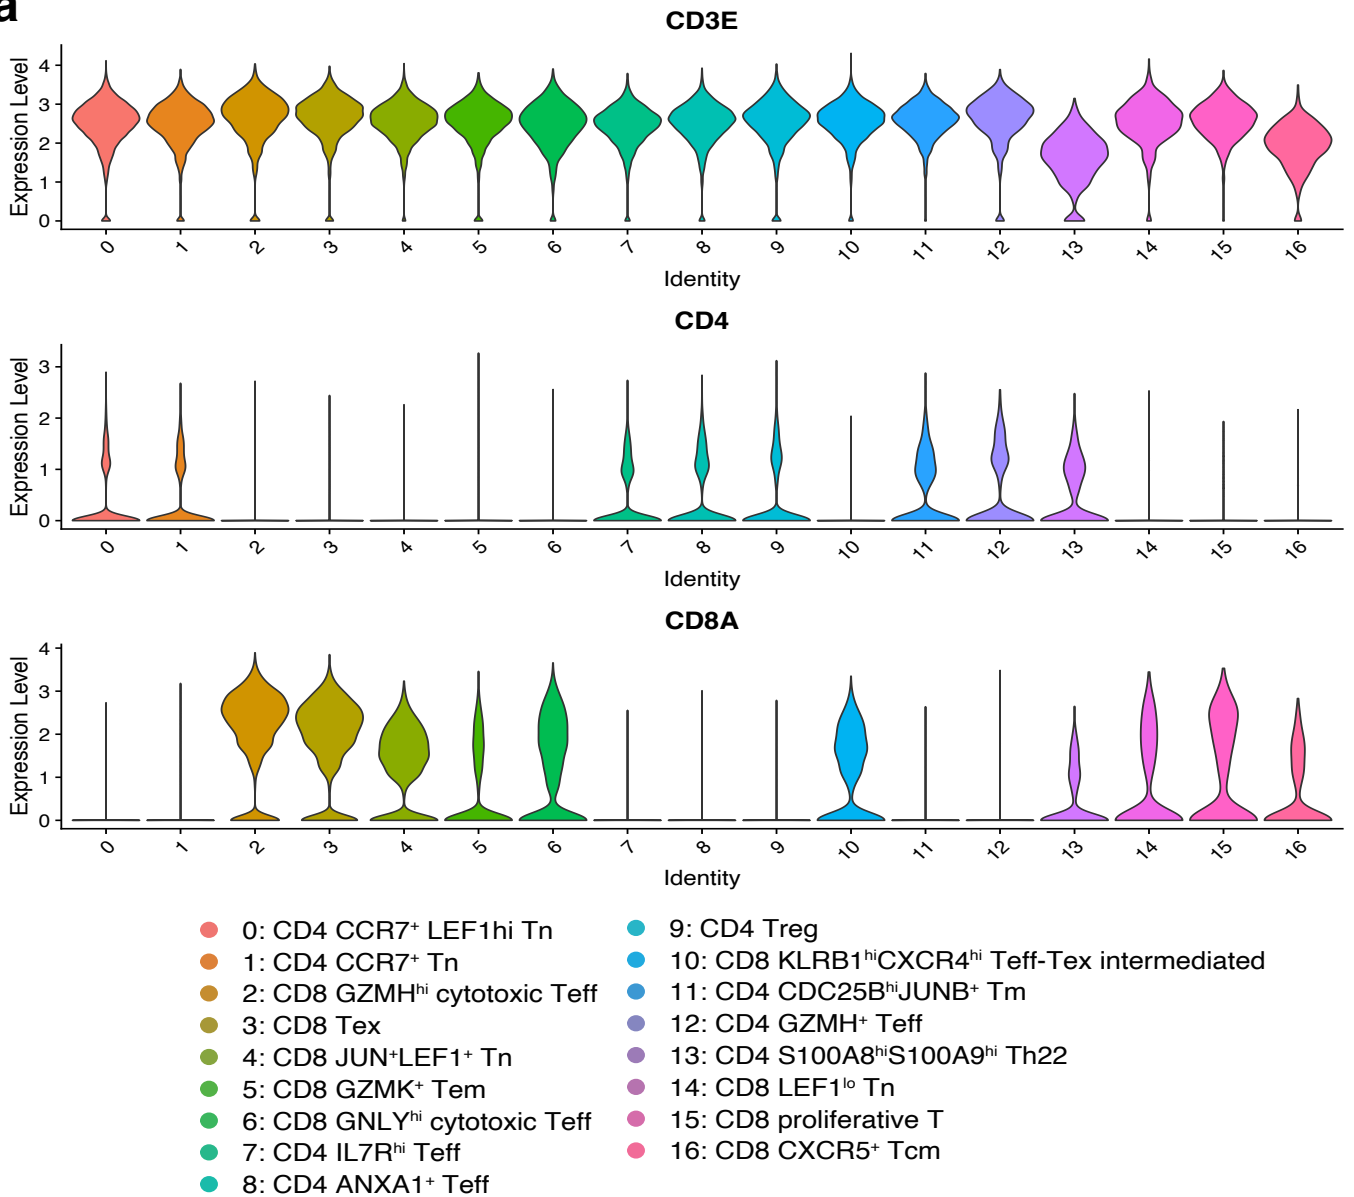

**b**

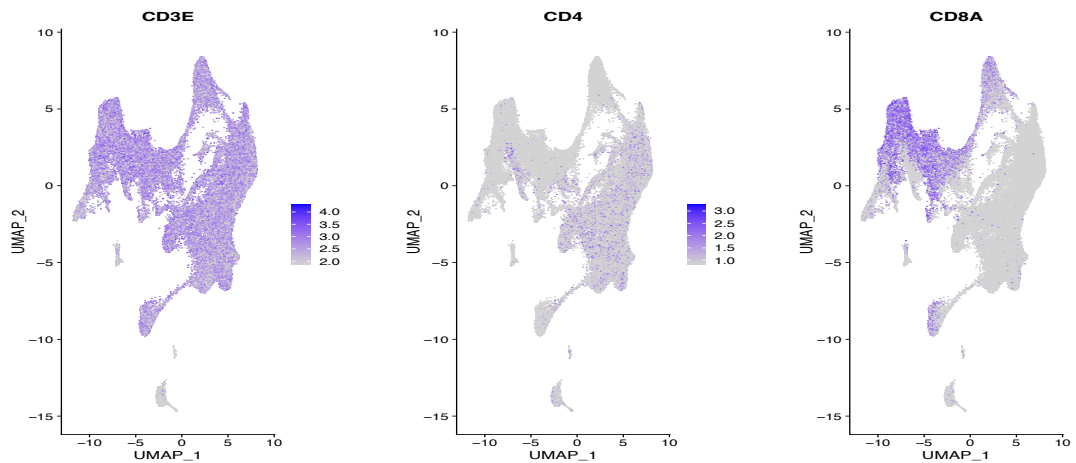

# Supplementary Fig. S5

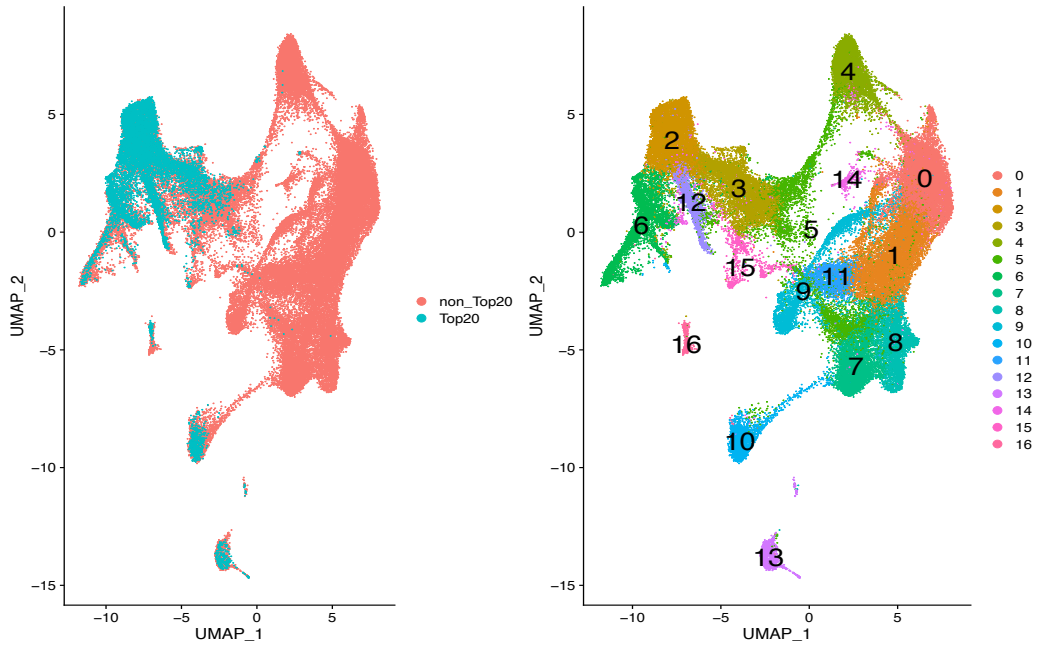

- |                                                  |                                                                          |
|--------------------------------------------------|--------------------------------------------------------------------------|
| ● 0: CD4 CCR7 <sup>+</sup> LEF1 <sup>hi</sup> Tn | ● 9: CD4 Treg                                                            |
| ● 1: CD4 CCR7 <sup>+</sup> Tn                    | ● 10: CD8 KLRB1 <sup>hi</sup> CXCR4 <sup>hi</sup> Teff-Tex intermediated |
| ● 2: CD8 GZMH <sup>hi</sup> cytotoxic Teff       | ● 11: CD4 CDC25B <sup>hi</sup> JUNB <sup>+</sup> Tm                      |
| ● 3: CD8 Tex                                     | ● 12: CD4 GZMH <sup>+</sup> Teff                                         |
| ● 4: CD8 JUN <sup>+</sup> LEF1 <sup>+</sup> Tn   | ● 13: CD4 S100A8 <sup>hi</sup> S100A9 <sup>hi</sup> Th22                 |
| ● 5: CD8 GZMK <sup>+</sup> Tem                   | ● 14: CD8 LEF1 <sup>lo</sup> Tn                                          |
| ● 6: CD8 GNLY <sup>hi</sup> cytotoxic Teff       | ● 15: CD8 proliferative T                                                |
| ● 7: CD4 IL7R <sup>hi</sup> Teff                 | ● 16: CD8 CXCR5 <sup>+</sup> Tcm                                         |
| ● 8: CD4 ANXA1 <sup>+</sup> Teff                 |                                                                          |



# Supplementary Fig. S7

**a**

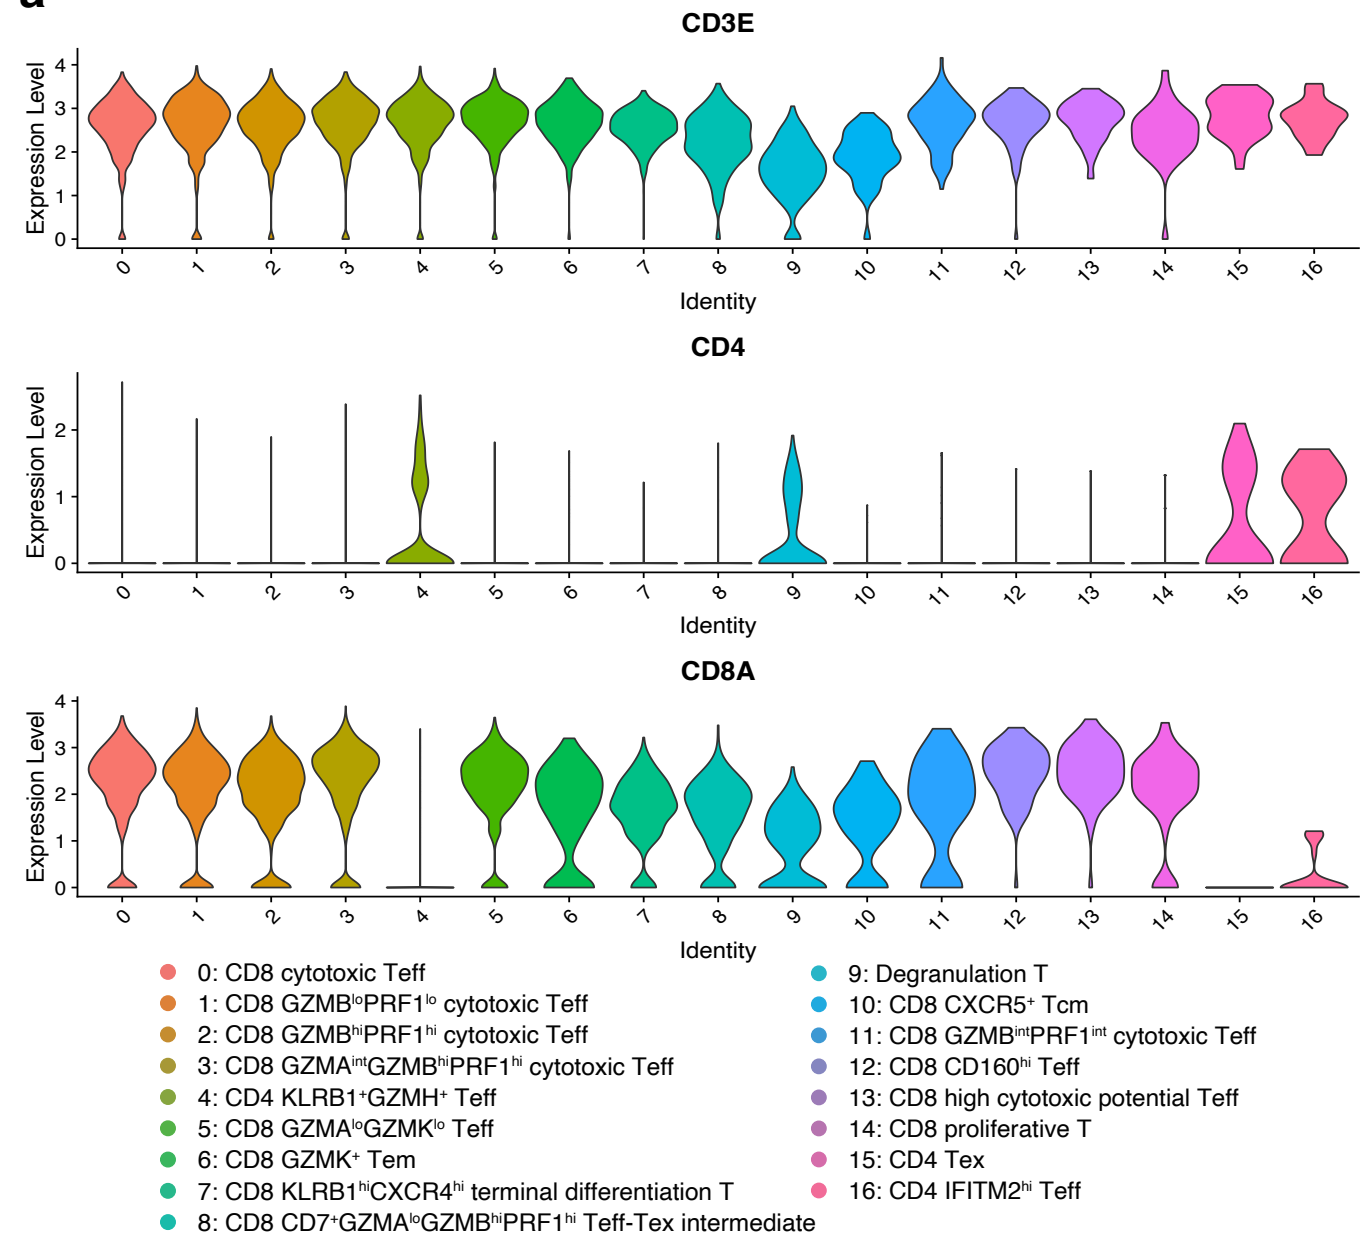

**b**

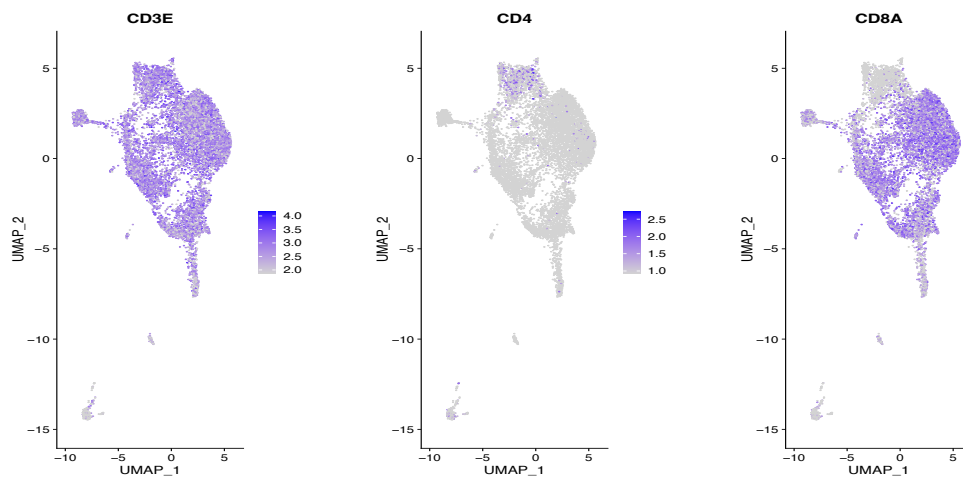

# Supplementary Fig. S8

**a**

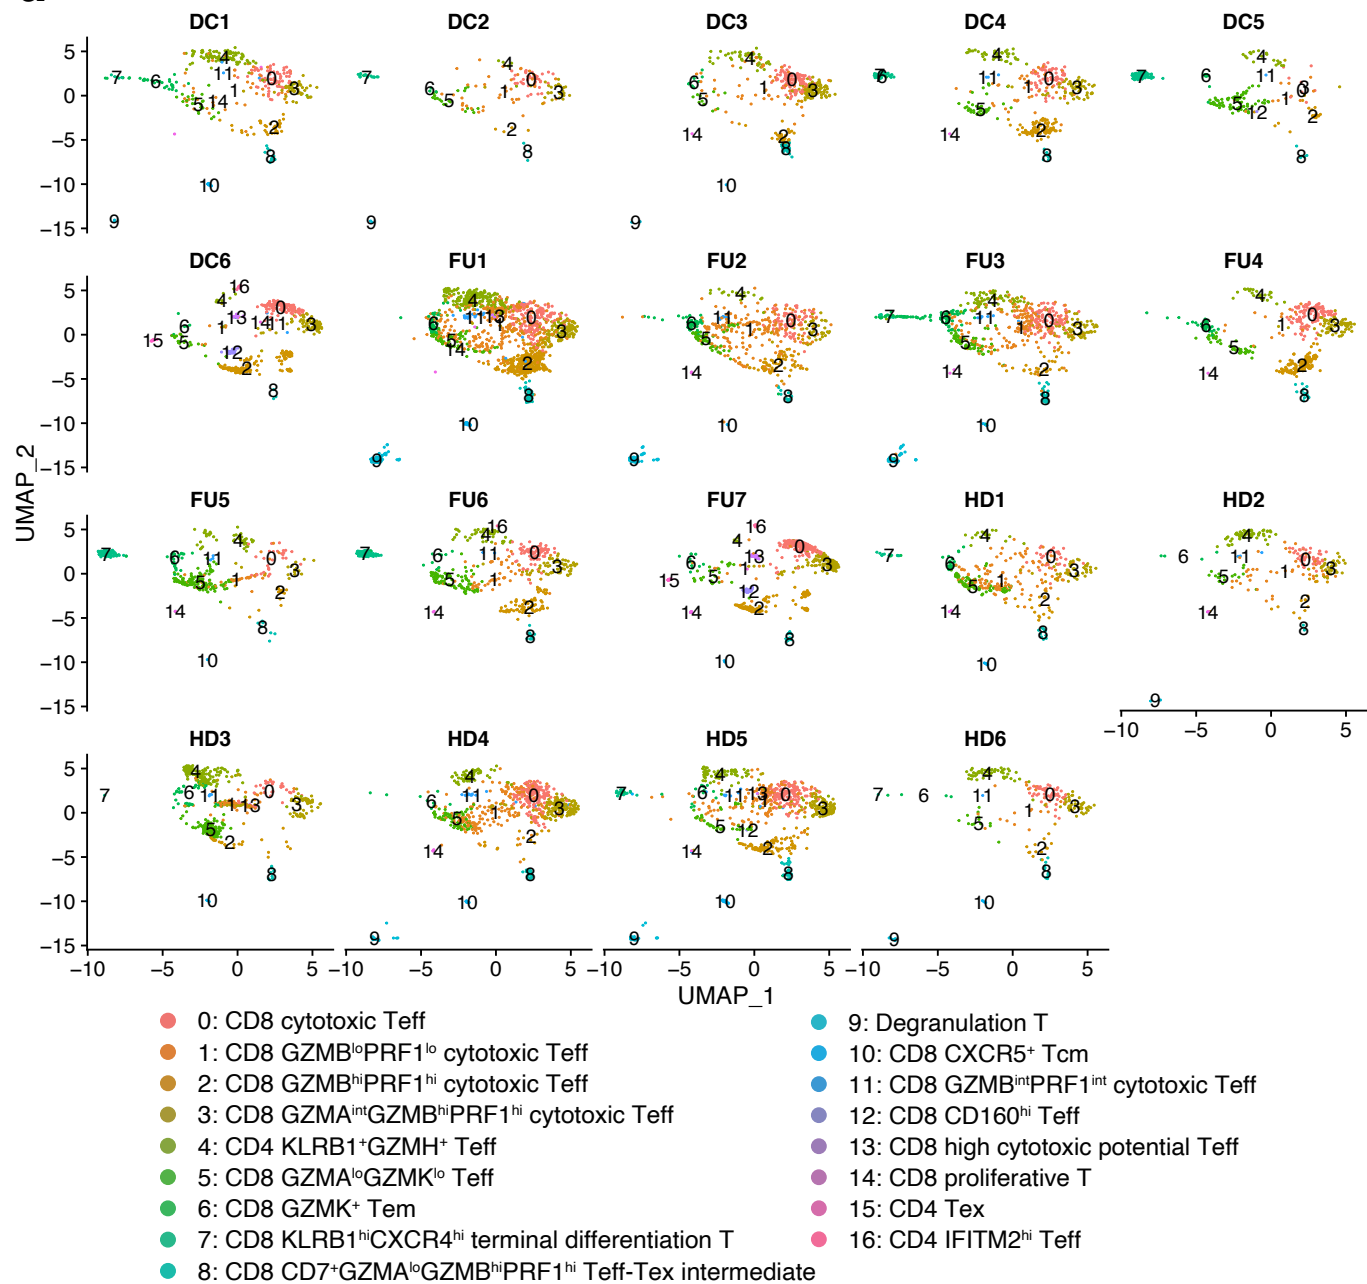

**b**

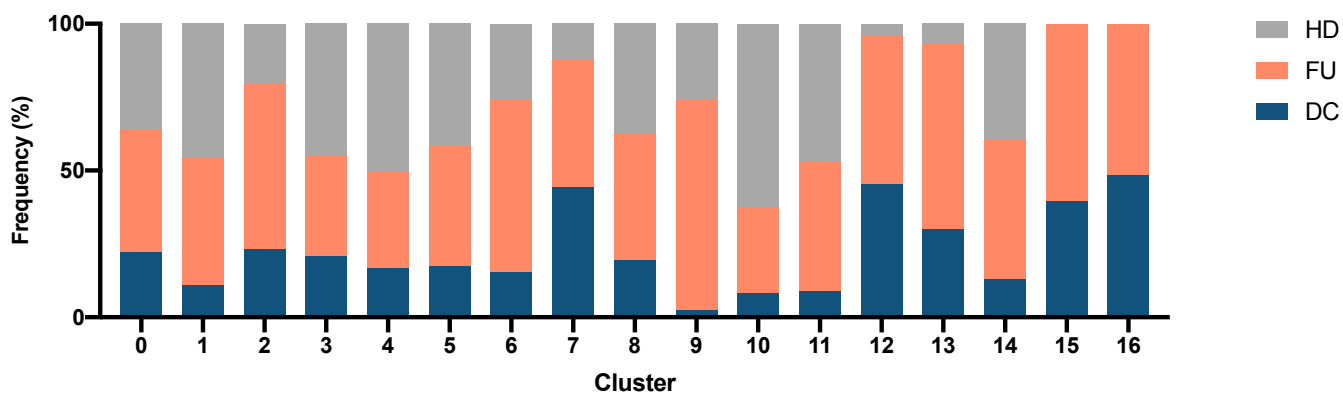





# Supplementary Fig. S10

Discharged vs HD (Top20 CD8<sup>+</sup> T cells)

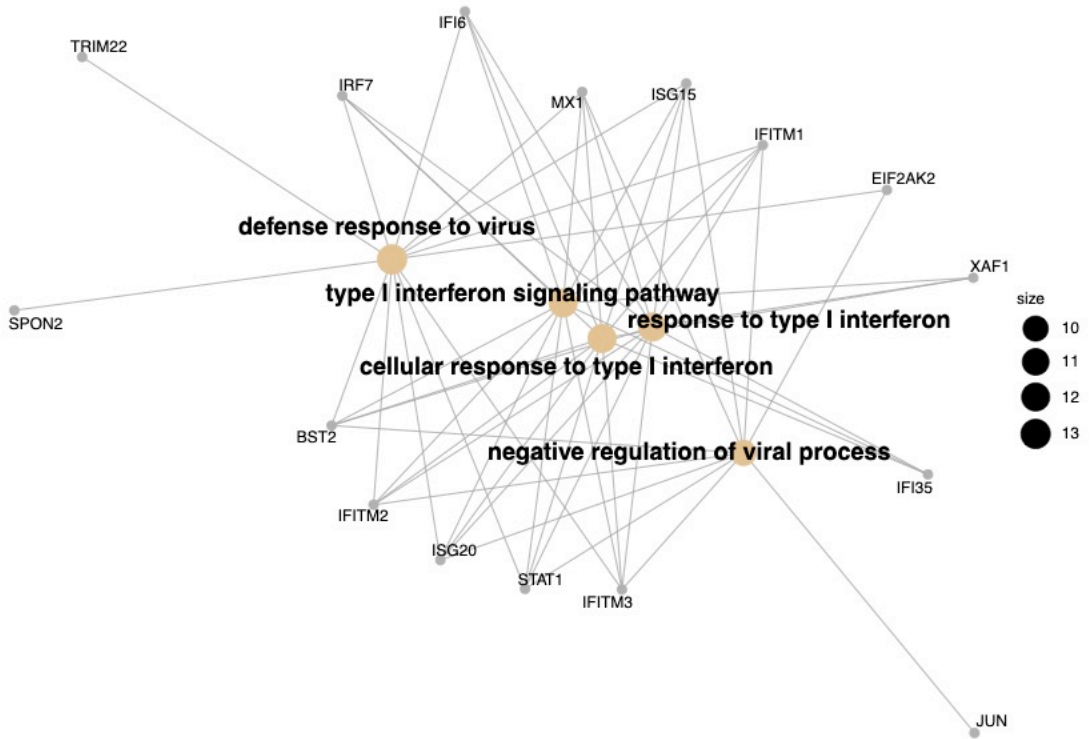

# Supplementary Fig. S11

**a**

Discharged vs HD (Total CD8<sup>+</sup> T cells)

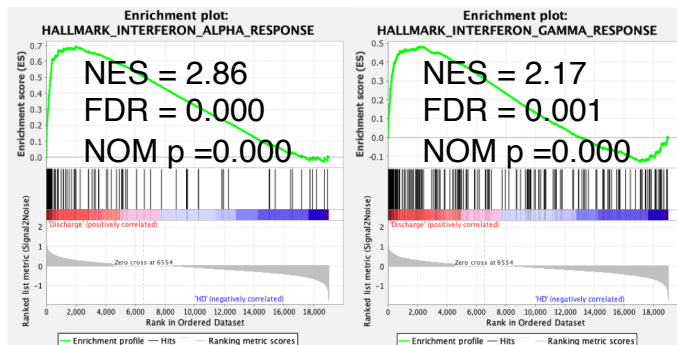

**b**

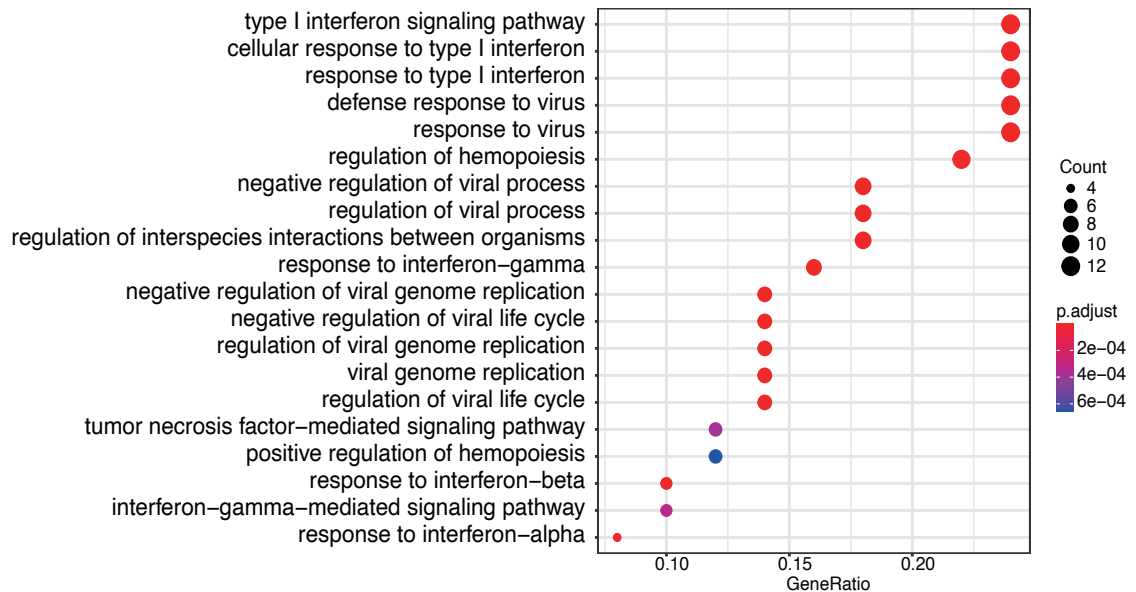

# Supplementary Fig. S12

## Follow-up vs HD (Total CD8<sup>+</sup> T cells)

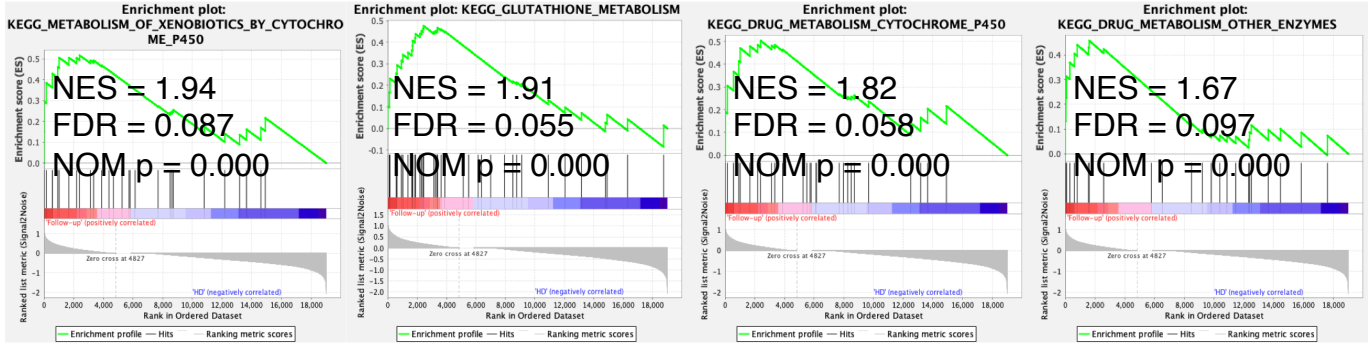

# Supplementary Fig. S13

## Early Follow-up vs HD (Top20 CD8<sup>+</sup> T cells)

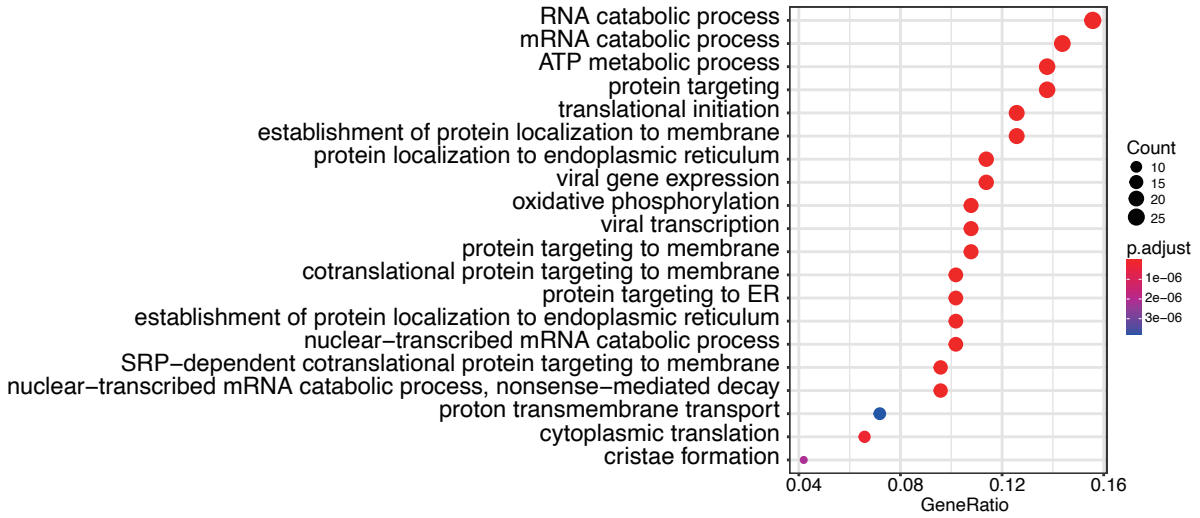

# Supplementary Fig. S14

Regulon Specificity Score Scatter Plot for  
*CD8A<sup>+</sup>GZMK<sup>+</sup>* Tem of Late Follow-up

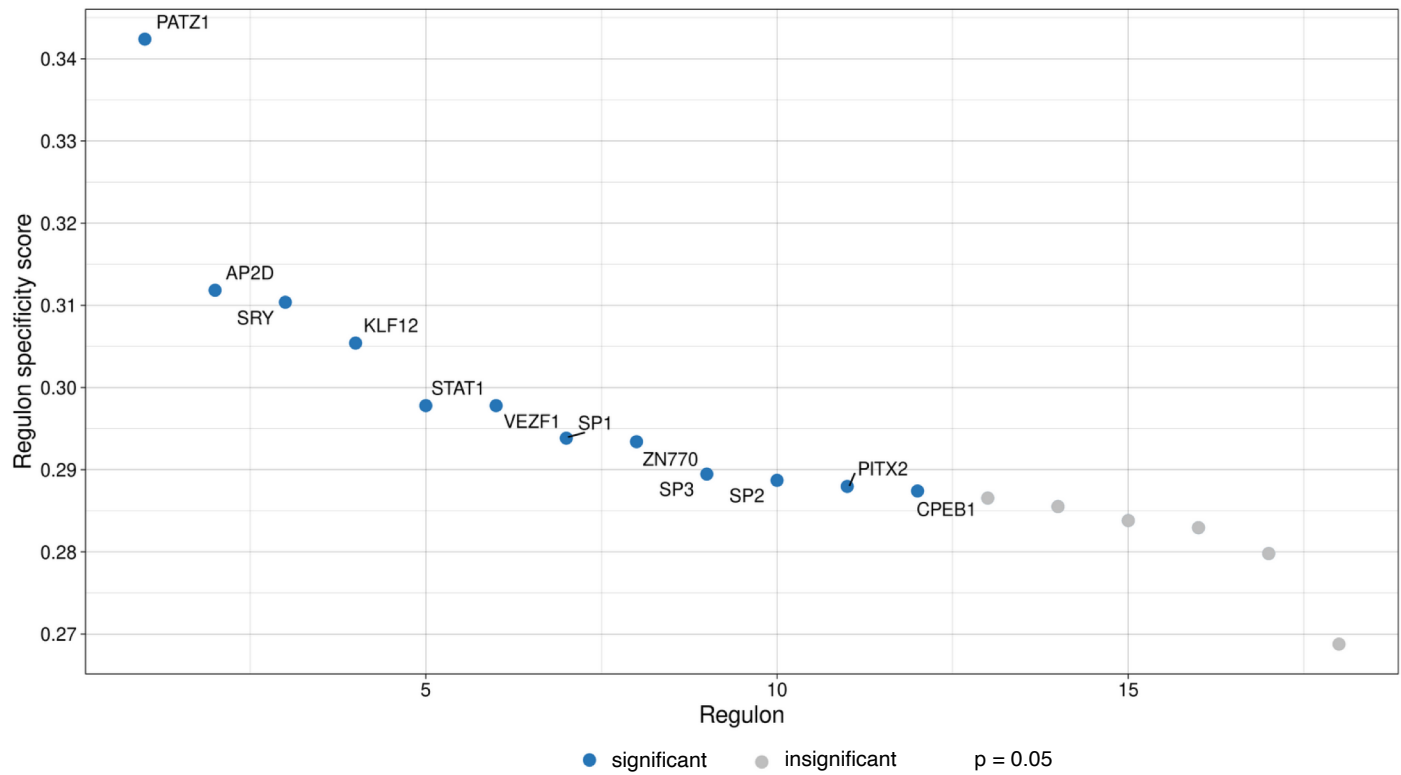

**Supplementary Table S1 Clinical and Pathological Characteristics of the COVID-19 Patients and Healthy Donors**

|                                       | HD1 | HD2 | HD3 | HD4 | HD5 | HD6 | DC1         | DC2         | DC3         | DC4         | DC5         | DC6         | EFU1 (FU1)  | EFU2 (FU2)  | EFU3 (FU3)  | LFU1 (FU4)  | LFU2 (FU5 =DC4) | LFU3 (FU6 =DC5) | LFU4 (FU7 =DC6) |   |
|---------------------------------------|-----|-----|-----|-----|-----|-----|-------------|-------------|-------------|-------------|-------------|-------------|-------------|-------------|-------------|-------------|-----------------|-----------------|-----------------|---|
| <b>Sex</b>                            | F   | M   | M   | F   | F   | M   | F           | M           | M           | M           | F           | F           | M           | F           | M           | M           | M               | M               | F               | F |
| <b>Age</b>                            | 37  | 27  | 27  | 66  | 36  | 31  | 29          | 35          | 32          | 42          | 49          | 32          | 51          | 44          | 46          | 35          | 42              | 49              | 32              |   |
| <b>Days in Hospital</b>               | -   | -   | -   | -   | -   | -   | 27          | 20          | 14          | 14          | 17          | 18          | 16          | 15          | 19          | 20          | 14              | 17              | 18              |   |
| <b>Sampling Time</b>                  | -   | -   | -   | -   | -   | -   | -6          | 0           | 0           | 1           | -2          | 0           | 7           | 7           | 7           | 30          | 40              | 19              | 30              |   |
| <b>S Antigen-IgG</b>                  | -   | -   | -   | -   | -   | -   | P(+)        | P(+)        | P(+)        | -           | -           | -           | P(+++)      | P(+++)      | P(+++)      | -           | -               | -               | -               |   |
| <b>S Antigen-IgM</b>                  | -   | -   | -   | -   | -   | -   | P(+)        | P(+)        | N           | -           | -           | -           | P(+)        | P(+)        | P(+)        | -           | -               | -               | -               |   |
| <b>BT NA Test</b>                     | -   | -   | -   | -   | -   | -   | P           | P           | P           | P           | P           | P           | P           | P           | P           | P           | P               | P               | P               |   |
| <b>Outcome of Disease</b>             | -   | -   | -   | -   | -   | -   | CR          | CR          | CR          | CR          | CR          | CR          | CR          | CR          | CR          | CR          | CR              | CR              | CR              |   |
| <b>Discharge NA Test</b>              | N   | N   | N   | N   | N   | N   | N           | N           | N           | N           | N           | N           | N           | N           | N           | N           | N               | N               | N               |   |
| <b>Disease Severity</b> <sup>27</sup> | 0   | 0   | 0   | 0   | 0   | 0   | 3           | 3           | 3           | 3           | 3           | 3           | 3           | 3           | 3           | 3           | 3               | 3               | 3               |   |
| <b>HLA-A Antigen</b>                  | -   | -   | -   | -   | -   | -   | HLA-A*02:07 | -           | -           | HLA-A*02:06 | HLA-A*11:01 | HLA-A*11:01 | HLA-A*11:01 | HLA-A*02:01 | HLA-A*02:03 | HLA-A*11:01 | HLA-A*02:06     | HLA-A*11:01     | HLA-A*11:01     |   |
|                                       |     |     |     |     |     |     | HLA-A*02:07 | HLA-A*02:07 | HLA-A*02:07 | HLA-A*02:07 | HLA-A*02:07 | HLA-A*02:07 | HLA-A*02:07 | HLA-A*02:07 | HLA-A*02:07 | HLA-A*02:07 | HLA-A*02:07     | HLA-A*02:07     | HLA-A*02:07     |   |

HD, Healthy donor group; DC, Discharged group; EFU, Early Follow-up group; LFU, Late Follow-up; F, female; M, male; S antigen, Novel Coronavirus spike antigen; P, positive; N, negative; BT, before treatment; NA, nucleic acid; -, not performed; CR, complete recovery.

**Supplementary Table S2 The scRNA-seq / scTCR-seq protocol and data characteristics in the current study via Cell Ranger analysis**

| Donor          | Protocol | Number of Reads | Estimated Cell | Median Gene/Cell | Mean Reads/Cell | Median UMI/Cell | Fraction Reads in Cells(%) | Estimated T Cell | Cells with Productive V-J pair | Mean Read Pairs/Cell | Paired Clonotype Diversity |
|----------------|----------|-----------------|----------------|------------------|-----------------|-----------------|----------------------------|------------------|--------------------------------|----------------------|----------------------------|
| HD1            | 5'+VDJ   | 311,311,571     | 11,067         | 1,082            | 28,130          | 3,086           | 85.5%                      | 4,924            | 2,865                          | 6,018                | 140.29                     |
| HD2            | 5'+VDJ   | 331,176,719     | 7,099          | 1,227            | 46,651          | 3,855           | 90.1%                      | 3,704            | 2,351                          | 8,836                | 685.84                     |
| HD3            | 5'+VDJ   | 276,137,518     | 8,228          | 1,320            | 33,561          | 3,983           | 91.4%                      | 4,128            | 2,746                          | 10,548               | 121.07                     |
| HD4            | 5'+VDJ   | 849,896,247     | 10,016         | 1,752            | 84,854          | 5,092           | 97.5%                      | 5,475            | 4,502                          | 6,381                | 68.44                      |
| HD5            | 5'+VDJ   | 859,323,606     | 11,556         | 1,699            | 74,362          | 4,676           | 97.0%                      | 5,876            | 4,750                          | 6,448                | 38.32                      |
| HD6            | 5'+VDJ   | 823,645,256     | 11,607         | 1,643            | 70,961          | 4,914           | 97.8%                      | 6,089            | 5,403                          | 5,580                | 994.46                     |
| DC1            | 5'+VDJ   | 294,905,555     | 12,058         | 1,056            | 24,457          | 3,030           | 85.6%                      | 6,715            | 5,361                          | 4,240                | 1,914.36                   |
| DC2            | 5'+VDJ   | 278,083,003     | 13,965         | 1,136            | 19,913          | 2,589           | 92.8%                      | 7,113            | 5,452                          | 4,016                | 3,871.36                   |
| DC3            | 5'+VDJ   | 335,845,056     | 9,764          | 994              | 34,396          | 2,514           | 95.1%                      | 6,914            | 4,299                          | 4,006                | 820.78                     |
| DC4            | 5'+VDJ   | 833,182,912     | 9,552          | 1,418            | 87,226          | 4,685           | 94.6%                      | 3,848            | 2,646                          | 9,629                | 225.69                     |
| DC5            | 5'+VDJ   | 789,803,278     | 12,264         | 1,499            | 64,400          | 5,224           | 94.8%                      | 6,349            | 4,457                          | 5,289                | 700.77                     |
| DC6            | 5'+VDJ   | 857,408,210     | 10,041         | 1,634            | 85,391          | 5,065           | 97.1%                      | 5,771            | 4,411                          | 5,772                | 265.24                     |
| EFU1 (FU1)     | 5'+VDJ   | NA              | NA             | NA               | NA              | NA              | NA                         | 5,737            | 4,857                          | 5,249                | 70.84                      |
| EFU2 (FU2)     | 5'+VDJ   | NA              | NA             | NA               | NA              | NA              | NA                         | 2,854            | 2,392                          | 8,498                | 145.6                      |
| EFU3 (FU4)     | 5'+VDJ   | NA              | NA             | NA               | NA              | NA              | NA                         | 5,004            | 3,463                          | 4,966                | 155.24                     |
| LFU1 (FU4)     | 5'+VDJ   | 985,510,175     | 20,195         | 1,422            | 48,800          | 4,709           | 95.9%                      | 10,154           | 8,088                          | 3,125                | 431.68                     |
| LFU2 (FU5=DC4) | 5'+VDJ   | 904,401,057     | 14,374         | 1,442            | 62,919          | 4,567           | 96.2%                      | 5,241            | 4,262                          | 4,865                | 243.81                     |
| LFU3 (FU6=DC5) | 5'+VDJ   | 783,735,335     | 14,885         | 1,538            | 52,653          | 4,834           | 96.1%                      | 6,114            | 5,259                          | 3,539                | 353.04                     |
| LFU4 (FU7=DC6) | 5'+VDJ   | 765,363,789     | 11,615         | 1,364            | 65,894          | 4,031           | 96.0%                      | 5,700            | 4,567                          | 3,525                | 70.20                      |



**Supplementary Table S3 The scRNA-seq / scTCR-seq protocol and data characteristics in the current study via Seurat package**

| Donor          | ScRNA-seq Cell Counts | Filtered ScRNA Cells Counts by Quality Control | TRA Counts | TRB Counts | Paired TRA-TRB Cell Counts | Filtered TRA Counts | Filtered TRB Counts | Filtered Paired TRA-TRB Cell Counts | Filtered $\alpha\beta$ TCR-scRNA Cells Counts |
|----------------|-----------------------|------------------------------------------------|------------|------------|----------------------------|---------------------|---------------------|-------------------------------------|-----------------------------------------------|
| HD1            | 11067                 | 8093                                           | 4112       | 6137       | 3418                       | 3530                | 5293                | 3125                                | 2740                                          |
| HD2            | 7099                  | 6005                                           | 3318       | 4720       | 2698                       | 2838                | 3996                | 2510                                | 2323                                          |
| HD3            | 8228                  | 5733                                           | 3873       | 5054       | 3130                       | 3209                | 4347                | 2888                                | 2239                                          |
| HD4            | 10016                 | 7408                                           | 7417       | 9449       | 5158                       | 6042                | 6881                | 4833                                | 3852                                          |
| HD5            | 11556                 | 5636                                           | 7627       | 10557      | 5473                       | 6595                | 7609                | 5203                                | 2744                                          |
| HD6            | 11607                 | 6148                                           | 8607       | 11052      | 5948                       | 7193                | 7647                | 5652                                | 3476                                          |
| DC1            | 12058                 | 9484                                           | 7943       | 8702       | 5843                       | 6809                | 7331                | 5597                                | 5237                                          |
| DC2            | 13965                 | 12715                                          | 8034       | 9412       | 6023                       | 6769                | 7759                | 5709                                | 5446                                          |
| DC3            | 9764                  | 9468                                           | 6069       | 8763       | 4907                       | 5148                | 7488                | 4565                                | 4483                                          |
| DC4            | 4271                  | 3938                                           | 3492       | 4740       | 2936                       | 3044                | 3249                | 2678                                | 2034                                          |
| DC5            | 6173                  | 5653                                           | 5895       | 7996       | 5156                       | 5128                | 6328                | 4543                                | 3412                                          |
| DC6            | 5919                  | 4954                                           | 5938       | 7270       | 4946                       | 5193                | 5815                | 4502                                | 3428                                          |
| EFU1 (FU1)     | 13911                 | 13145                                          | 6569       | 7079       | 5128                       | 5740                | 5983                | 4977                                | 4824                                          |
| EFU2 (FFU2)    | 12586                 | 12052                                          | 3369       | 3575       | 2554                       | 2972                | 2954                | 2485                                | 2419                                          |
| EFU3 (FU3)     | 21037                 | 19791                                          | 4893       | 6276       | 3811                       | 4236                | 5349                | 3634                                | 3419                                          |
| LFU1 (FU4)     | 10036                 | 6014                                           | 13443      | 17106      | 9356                       | 11290               | 13523               | 8802                                | 4689                                          |
| LFU2 (FU5=DC4) | 5944                  | 4092                                           | 6839       | 9268       | 4777                       | 5866                | 6839                | 4556                                | 2859                                          |
| LFU3 (FU6=DC5) | 7387                  | 5517                                           | 8774       | 11475      | 5904                       | 7286                | 8389                | 5578                                | 3795                                          |
| LFU4 (FU7=DC6) | 6210                  | 3885                                           | 7399       | 9866       | 5242                       | 6380                | 7137                | 5006                                | 2933                                          |

**Supplementary Table S4 Performed scRNA-seq and paired TCR cell count in each group**

|                                                                                                     |                                                                      | <b>HD</b> | <b>Discharged</b> | <b>Follow-up</b> |
|-----------------------------------------------------------------------------------------------------|----------------------------------------------------------------------|-----------|-------------------|------------------|
| Raw Cells                                                                                           |                                                                      | 59573     | 52150             | 77381            |
| Filtered Cells by Quality Control                                                                   |                                                                      | 39023     | 46212             | 64496            |
|                                                                                                     | Total cells                                                          | 17374     | 24040             | 24938            |
| Filtered $\alpha\beta$ TCR-scRNA Paired                                                             | <i>CD3E<sup>+</sup>CD4<sup>+</sup>CD8A<sup>-</sup></i> cluster cells | 8718      | 13232             | 11021            |
|                                                                                                     | <i>CD3E<sup>+</sup>CD4<sup>-</sup>CD8A<sup>+</sup></i> cluster cell  | 8354      | 10664             | 13227            |
|                                                                                                     | Total cells                                                          | 2902      | 2055              | 4854             |
| Filtered Top20 $\alpha\beta$ TCR-scRNA Paired                                                       | <i>CD3E<sup>+</sup>CD4<sup>+</sup>CD8A<sup>-</sup></i> cluster cells | 471       | 224               | 451              |
|                                                                                                     | <i>CD3E<sup>+</sup>CD4<sup>-</sup>CD8A<sup>+</sup></i> cluster cell  | 2382      | 1809              | 4194             |
| % of Filtered Top20 $\alpha\beta$ TCR Paired cells in Filtered Total $\alpha\beta$ TCR Paired Cells |                                                                      | 16.7%     | 8.54%             | 19.46%           |

**Supplementary Table S5 The unique-clone and multi-clone percentage in each group**

| <b>Pt#</b> | <b>Unique-clone (1 cell)</b> | <b>Multi-clone (<math>\geq 2</math> cells)</b> |
|------------|------------------------------|------------------------------------------------|
| HD         | 67.13%                       | 32.87%                                         |
| Discharged | 82.95%                       | 17.05%                                         |
| Follow-up  | 64.02%                       | 35.98%                                         |

Unique-clone = (cell count of all unique TCR classification / total cell count) \* 100%; Multi-clone = 100% - unique-clone.
